# Supplementary material
Source: MDPI journal article supplement (https://www.mdpi.com/1999-4907/14/10/2044)
Supplement: s1 [file s1]

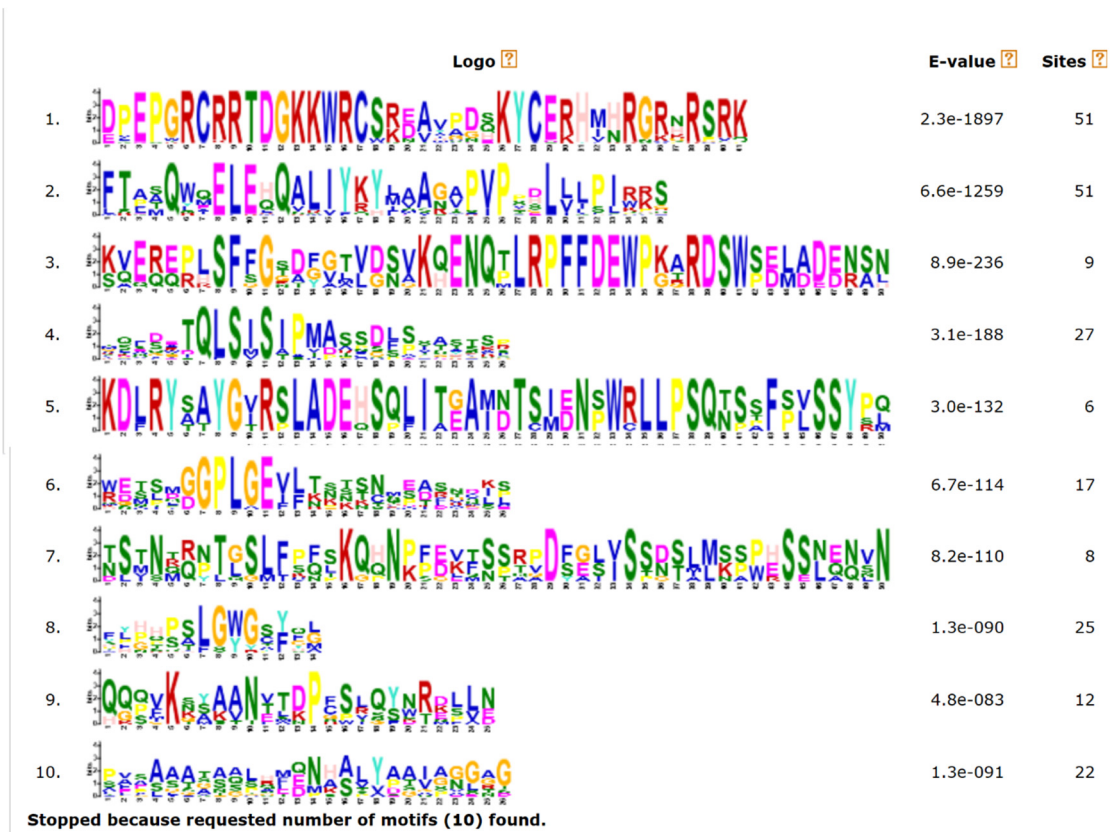

Figure S1 The conserved motif identified in the moso bamboo GRF family.

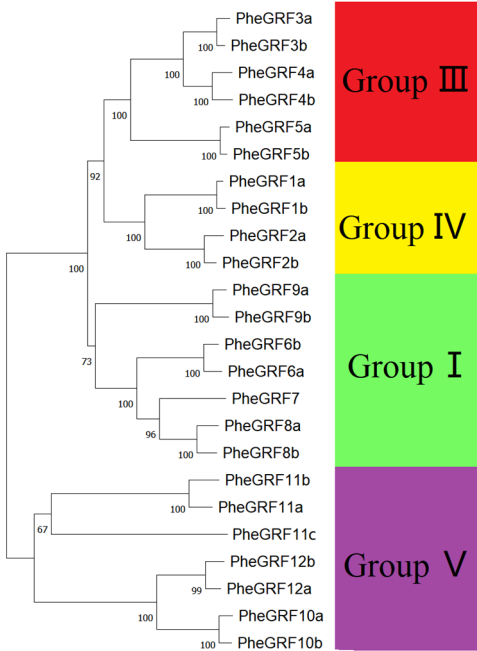

Figure S2 A neighbor-joining tree was constructed based on the alignment of full-length amino acid sequences of PheGRF protein.

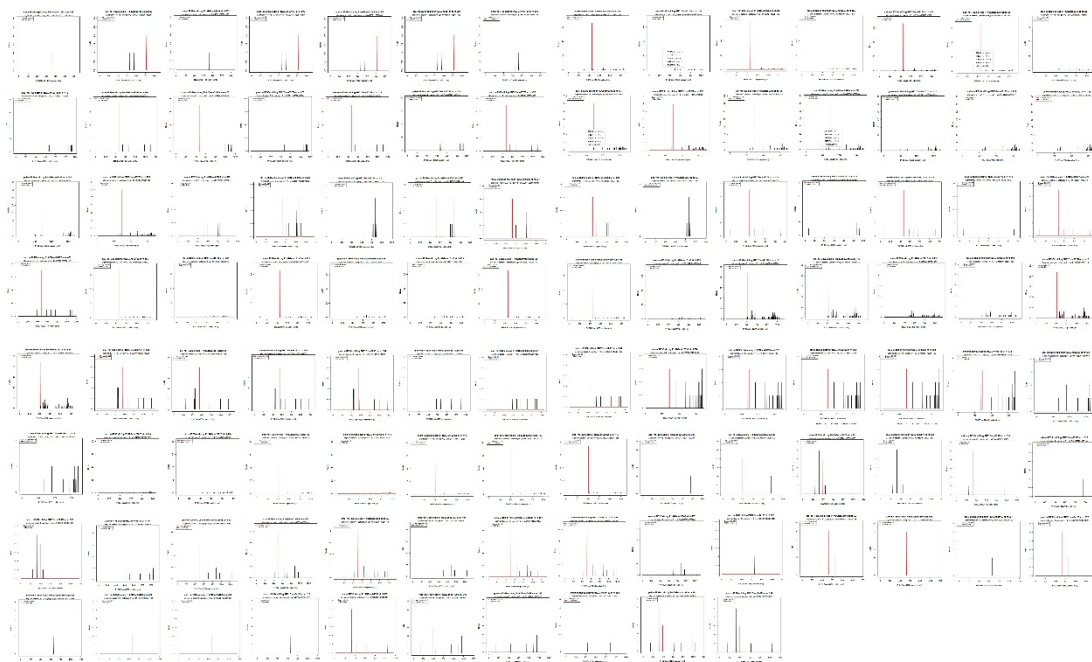

Figure S3 Splicing sites prediction based on degradation group sequencing.

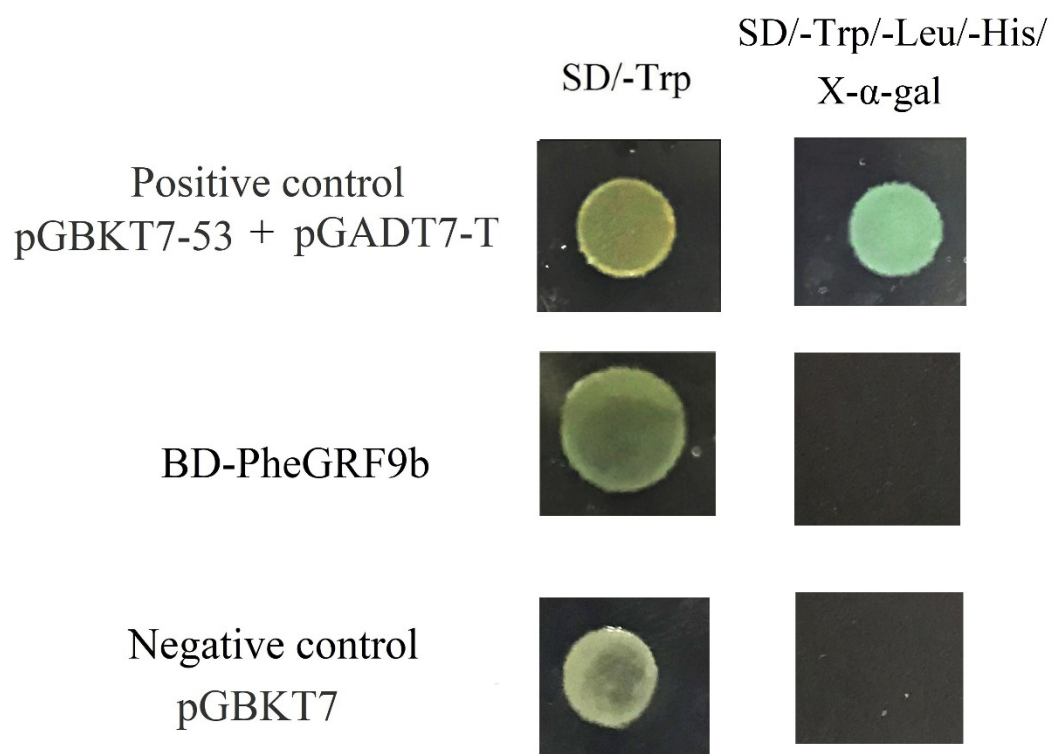

Figure S4 PheGRF9a self-transcription activation assay

Table S1 The Ka/Ks ratio of moso bamboo GRF gene pairs.

| Gene 1                       | Location                 | Gene 2                       | Location                 | Duplication types | Ka       | Ks       | Ka/Ks    |
|------------------------------|--------------------------|------------------------------|--------------------------|-------------------|----------|----------|----------|
| PH02Gene03768.t1 (PheGRF4a)  | hic_scaffold_3:86189727  | PH02Gene08777.t1 (PheGRF4b)  | hic_scaffold_17:18671790 | WGD               | 0.035096 | 0.141917 | 0.247302 |
| PH02Gene02258.t2 (PheGRF3a)  | hic_scaffold_23:12865011 | PH02Gene10190.t3 (PheGRF3b)  | hic_scaffold_24:61167988 | WGD               | 0.033063 | 0.066159 | 0.499757 |
| PH02Gene23215.t2 (PheGRF5a)  | hic_scaffold_6:6514485   | PH02Gene29026.t2 (PheGRF5b)  | hic_scaffold_8:1707627   | WGD               | 0.030261 | 0.096972 | 0.31206  |
| PH02Gene03385.t2 (PheGRF2a)  | hic_scaffold_8:14186770  | PH02Gene02620.t1 (PheGRF2b)  | hic_scaffold_6:15130344  | WGD               | 0.055414 | 0.153787 | 0.360331 |
| PH02Gene34199.t1 (PheGRF1a)  | hic_scaffold_17:6504498  | PH02Gene33579.t1 (PheGRF1b)  | hic_scaffold_3:97165941  | WGD               | 0.023117 | 0.143991 | 0.160542 |
| PH02Gene32022.t1 (PheGRF11a) | hic_scaffold_10:52546653 | PH02Gene45969.t1 (PheGRF11b) | hic_scaffold_4:30356073  | WGD               | 0.022526 | 0.144882 | 0.155475 |
| PH02Gene01931.t1 (PheGRF12a) | hic_scaffold_23:16329922 | PH02Gene00590.t1 (PheGRF12b) | hic_scaffold_24:58027198 | WGD               | 0.046145 | 0.101135 | 0.45627  |
| PH02Gene01484.t1 (PheGRF10a) | hic_scaffold_3:82398027  | PH02Gene03343.t1 (PheGRF10b) | hic_scaffold_17:22455120 | WGD               | 0.021573 | 0.146075 | 0.147682 |
| PH02Gene15670.t1 (PheGRF9a)  | hic_scaffold_15:79050765 | PH02Gene26381.t1 (PheGRF9b)  | hic_scaffold_21:28883675 | WGD               | 0.037645 | 0.138642 | 0.271527 |
| PH02Gene26399.t1 (PheGRF6a)  | hic_scaffold_21:19016635 | PH02Gene06203.t1 (PheGRF6b)  | hic_scaffold_15:86449468 | WGD               | 0.040375 | 0.147348 | 0.274009 |
| PH02Gene06385.t2 (PheGRF8a)  | hic_scaffold_7:51518367  | PH02Gene34169.t1 (PheGRF8b)  | hic_scaffold_15:24940152 | WGD               | 0.061216 | 0.107567 | 0.569103 |
| PH02Gene02258.t2 (PheGRF3a)  | hic_scaffold_23:12865011 | PH02Gene08777.t1 (PheGRF4b)  | hic_scaffold_17:18671790 | WGD               | 0.127392 | 0.430448 | 0.295951 |
| PH02Gene03768.t1 (PheGRF4a)  | hic_scaffold_3:86189727  | PH02Gene02258.t2 (PheGRF3a)  | hic_scaffold_23:12865011 | WGD               | 0.136772 | 0.444735 | 0.307535 |
| PH02Gene03768.t1 (PheGRF4a)  | hic_scaffold_3:86189727  | PH02Gene10190.t3 (PheGRF3b)  | hic_scaffold_24:61167988 | WGD               | 0.131    | 0.435394 | 0.300878 |
| PH02Gene10190.t3 (PheGRF3b)  | hic_scaffold_24:61167988 | PH02Gene08777.t1 (PheGRF4b)  | hic_scaffold_17:18671790 | WGD               | 0.119446 | 0.441194 | 0.270733 |
| PH02Gene33803.t1 (PheGRF7)   | hic_scaffold_12:32116354 | PH02Gene26399.t1 (PheGRF6a)  | hic_scaffold_21:19016635 | Dispersed         | 0.399799 | 2.003109 | 0.199589 |
| PH02Gene33803.t1 (PheGRF7)   | hic_scaffold_12:32116354 | PH02Gene06203.t1 (PheGRF6b)  | hic_scaffold_15:86449468 | Dispersed         | 0.397698 | 2.168189 | 0.183424 |
| PH02Gene06385.t2 (PheGRF8a)  | hic_scaffold_7:51518367  | PH02Gene33803.t1 (PheGRF7)   | hic_scaffold_12:32116354 | Dispersed         | 0.298967 | 1.037966 | 0.288031 |

Table S2 The accession numbers of the GRFs from each species.

| Species name                        | Gene name | ID               | Accession number |
|-------------------------------------|-----------|------------------|------------------|
| <i>Vigna unguiculata</i>            | VunGRF    | Vun004052        | \                |
| <i>Arabidopsis thaliana</i>         | AtGR6     | AT2G06200.1      | AY060586         |
| <i>Arabidopsis thaliana</i>         | AtGR1     | AT2G22840.1      | AY102634         |
| <i>Arabidopsis thaliana</i>         | AtGR3     | AT2G36400.1      | AY102636         |
| <i>Arabidopsis thaliana</i>         | AtGR9     | AT2G45480.1      | AY074647         |
| <i>Arabidopsis thaliana</i>         | AtGR5     | AT3G13960.1      | AY102638         |
| <i>Arabidopsis thaliana</i>         | AtGR4     | AT3G52910.1      | AY102638         |
| <i>Arabidopsis thaliana</i>         | AtGR8     | AT4G24150.1      | AL109619         |
| <i>Arabidopsis thaliana</i>         | AtGR2     | AT4G37740.1      | AK176432         |
| <i>Arabidopsis thaliana</i>         | AtGR7     | AT5G53660.1      | AK176109         |
| <i>Oryza sativa subsp. japonica</i> | OsGRF10   | LOC_Os02g45570.1 | AK108170         |
| <i>Oryza sativa subsp. japonica</i> | OsGRF4    | LOC_Os02g47280.1 | AK063983         |
| <i>Oryza sativa subsp. japonica</i> | OsGRF1    | LOC_Os02g53690.1 | AF201895         |
| <i>Oryza sativa subsp. japonica</i> | OsGRF9    | LOC_Os03g47140.1 | AK058659         |
| <i>Oryza sativa subsp. japonica</i> | OsGRF6    | LOC_Os03g51970.1 | AK073578         |
| <i>Oryza sativa subsp. japonica</i> | OsGRF12   | LOC_Os04g48510.1 | AK110934         |
| <i>Oryza sativa subsp. japonica</i> | OsGRF3    | LOC_Os04g51190.1 | FJ546693         |
| <i>Oryza sativa subsp. japonica</i> | OsGRF5    | LOC_Os06g02560.1 | AK103508         |

|                                     |           |                  |          |
|-------------------------------------|-----------|------------------|----------|
| <i>Oryza sativa subsp. japonica</i> | OsGRF2    | LOC_Os06g10310.1 | CT836198 |
| <i>Oryza sativa subsp. japonica</i> | OsGRF11   | LOC_Os07g28430.1 | CT836198 |
| <i>Oryza sativa subsp. japonica</i> | OsGRF8    | LOC_Os11g35030.1 | AK103055 |
| <i>Oryza sativa subsp. japonica</i> | OsGRF7    | LOC_Os12g29980.1 | AK103055 |
| <i>Phyllostachys edulis</i>         | PheGRF12b | PH02Gene00590.t1 | \        |
| <i>Phyllostachys edulis</i>         | PheGRF10a | PH02Gene01484.t1 | \        |
| <i>Phyllostachys edulis</i>         | PheGRF12a | PH02Gene01931.t1 | \        |
| <i>Phyllostachys edulis</i>         | PheGRF3a  | PH02Gene02258.t2 | \        |
| <i>Phyllostachys edulis</i>         | PheGRF2b  | PH02Gene02620.t1 | \        |
| <i>Phyllostachys edulis</i>         | PheGRF10b | PH02Gene03343.t1 | \        |
| <i>Phyllostachys edulis</i>         | PheGRF2a  | PH02Gene03385.t2 | \        |
| <i>Phyllostachys edulis</i>         | PheGRF4a  | PH02Gene03768.t1 | \        |
| <i>Phyllostachys edulis</i>         | PheGRF6b  | PH02Gene06203.t1 | \        |
| <i>Phyllostachys edulis</i>         | PheGRF8a  | PH02Gene06385.t2 | \        |
| <i>Phyllostachys edulis</i>         | PheGRF4b  | PH02Gene08777.t1 | \        |
| <i>Phyllostachys edulis</i>         | PheGRF3b  | PH02Gene10190.t3 | \        |
| <i>Phyllostachys edulis</i>         | PheGRF9a  | PH02Gene15670.t1 | \        |
| <i>Phyllostachys edulis</i>         | PheGRF11c | PH02Gene22646.t2 | \        |
| <i>Phyllostachys edulis</i>         | PheGRF5a  | PH02Gene23215.t2 | \        |
| <i>Phyllostachys edulis</i>         | PheGRF9b  | PH02Gene26381.t1 | \        |
| <i>Phyllostachys edulis</i>         | PheGRF6a  | PH02Gene26399.t1 | \        |
| <i>Phyllostachys edulis</i>         | PheGRF5b  | PH02Gene29026.t2 | \        |
| <i>Phyllostachys edulis</i>         | PheGRF11a | PH02Gene32022.t1 | \        |
| <i>Phyllostachys edulis</i>         | PheGRF1b  | PH02Gene33579.t1 | \        |
| <i>Phyllostachys edulis</i>         | PheGRF7   | PH02Gene33803.t1 | \        |
| <i>Phyllostachys edulis</i>         | PheGRF8b  | PH02Gene34169.t1 | \        |
| <i>Phyllostachys edulis</i>         | PheGRF1a  | PH02Gene34199.t1 | \        |
| <i>Phyllostachys edulis</i>         | PheGRF11b | PH02Gene45969.t1 | \        |

Table S3 Primers used for qRT-PCR.

| Name              | Primer                   |
|-------------------|--------------------------|
| PH02Gene02258.t2F | GAGGGAGCCACTGTCTTTCT     |
| PH02Gene02258.t2R | CAGAGGTTGCCATCGGAATG     |
| PH02Gene03343.t1F | GAGAAAGAAGCCGACTCGC      |
| PH02Gene03343.t1R | AGTAGCGGTAGATGAGCACC     |
| PH02Gene10190.t3F | GGAGCGACTTTGTGACTGTC     |
| PH02Gene10190.t3R | CGGAATGGAGATCGAGAGCT     |
| PH02Gene23215.t2F | ACGGCAGCAAGTACTCTCTT     |
| PH02Gene23215.t2R | TGATGGCTCAAGGTGGGAAT     |
| PH02Gene26399.t1F | CCTATCATCGGCCTCCACAT     |
| PH02Gene26399.t1R | CTTGCTTCCATGGTGCTGTT     |
| TIP41F            | AAAATCATTGTAGGCCATTGTCTG |
| TIP41R            | ACTAAATTAAGCCAGCGGGAGTG  |
